# Supplementary material
Source: PubMed Central journal article supplement (PMC3594080)
Supplement: NIHMS445583-supplement-1_si_002.pdf [file NIHMS445583-supplement-1_si_002.pdf]

## Supporting material I

Single-shot proteomics using capillary zone electrophoresis-electrospray ionization-tandem mass spectrometry produces more than 1,250 *E. coli* peptide identifications in a 50-minute separation

Guijie Zhu<sup>†</sup>, Liangliang Sun<sup>†</sup>, Xiaojing Yan, Norman J. Dovichi\*

Department of Chemistry and Biochemistry, University of Notre Dame, Notre Dame, IN 46556, USA

**Author Contributions:** †These two authors contributed equally to this work.

S-Table 1 Peak intensities of five selected peptides produced by CZE-ESI-MS/MS and UPLC-ESI-MS/MS for the analysis of 1 ng *E. coli* tryptic digest

|                                     | CZE-ESI-MS/MS   |      | UPLC-ESI-MS/MS  |      |
|-------------------------------------|-----------------|------|-----------------|------|
|                                     | Peak intensity  | RSD  | Peak intensity  | RSD  |
| ELLSQYDFPGDDTPIVR(m/z 982.9840)     | (8.8 ± 1.3)E5   | 15%  | (4.59 ± 0.25)E4 | 5.5% |
| AGENVGVLLR (m/z 514.2988)           | (3.9 ± 0.9)E6   | 23%  | (3.7 ± 1.4)E5   | 37%  |
| SNTGLVIDPYFSGTK(m/z 799.9069)       | (4.1 ± 0.8)E5   | 19%  | (4.4 ± 0.7)E4   | 15%  |
| EADKLGYNLVVLD SQNNPAK(m/z 730.0469) | (3.18 ± 0.14)E5 | 4.3% | (1.74 ± 0.09)E4 | 5.2% |
| VIELQGIAGTSAAR (m/z 693.3914)       | (1.35 ± 0.16)E6 | 12%  | (1.4 ± 0.6)E5   | 42%  |

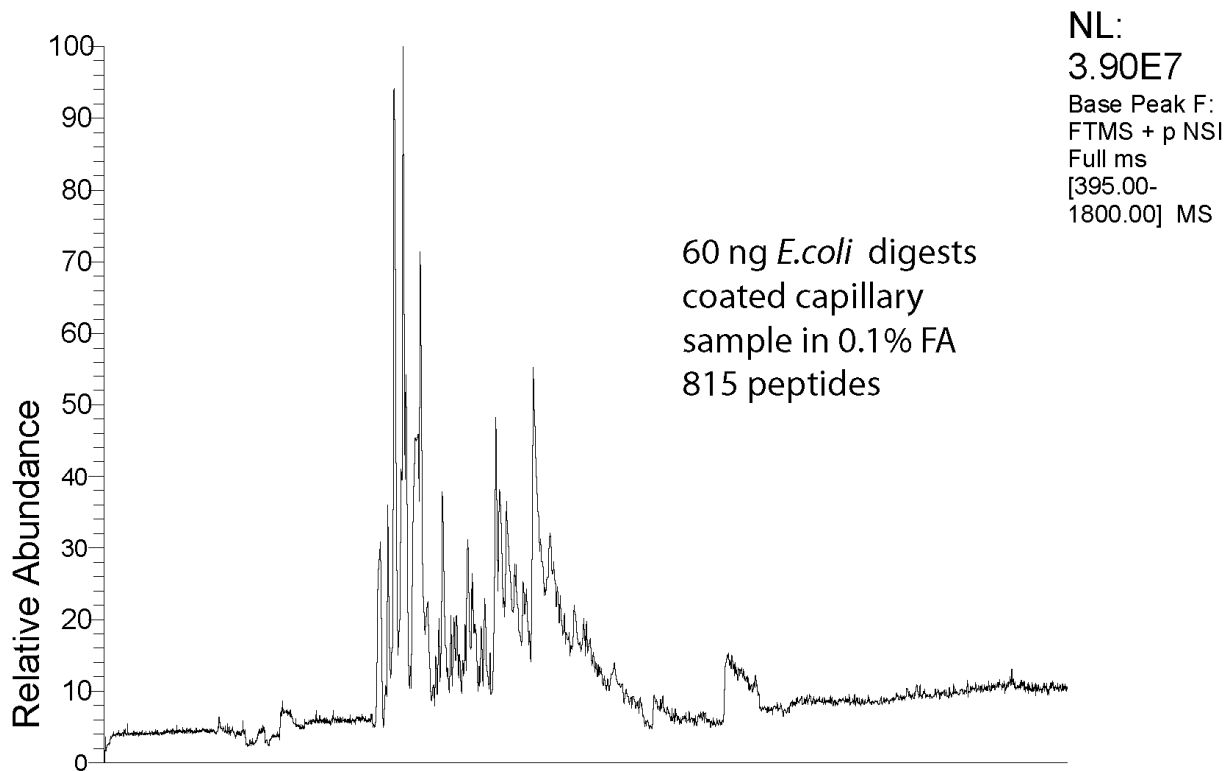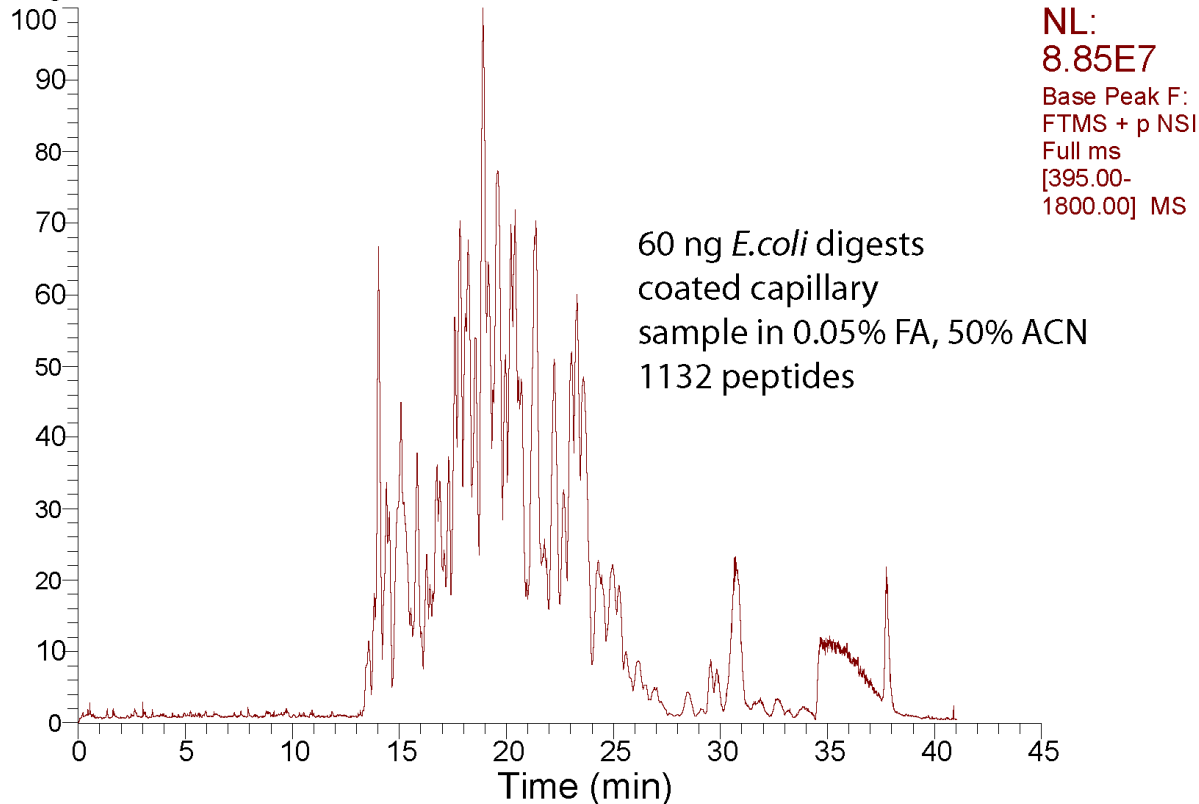

S-Figure 1 Base peak spectra of 60 ng *E.coli* digests dissolved in 0.1% FA and 0.05% FA with 50% ACN analyzed by CZE-ESI-MS/MS.

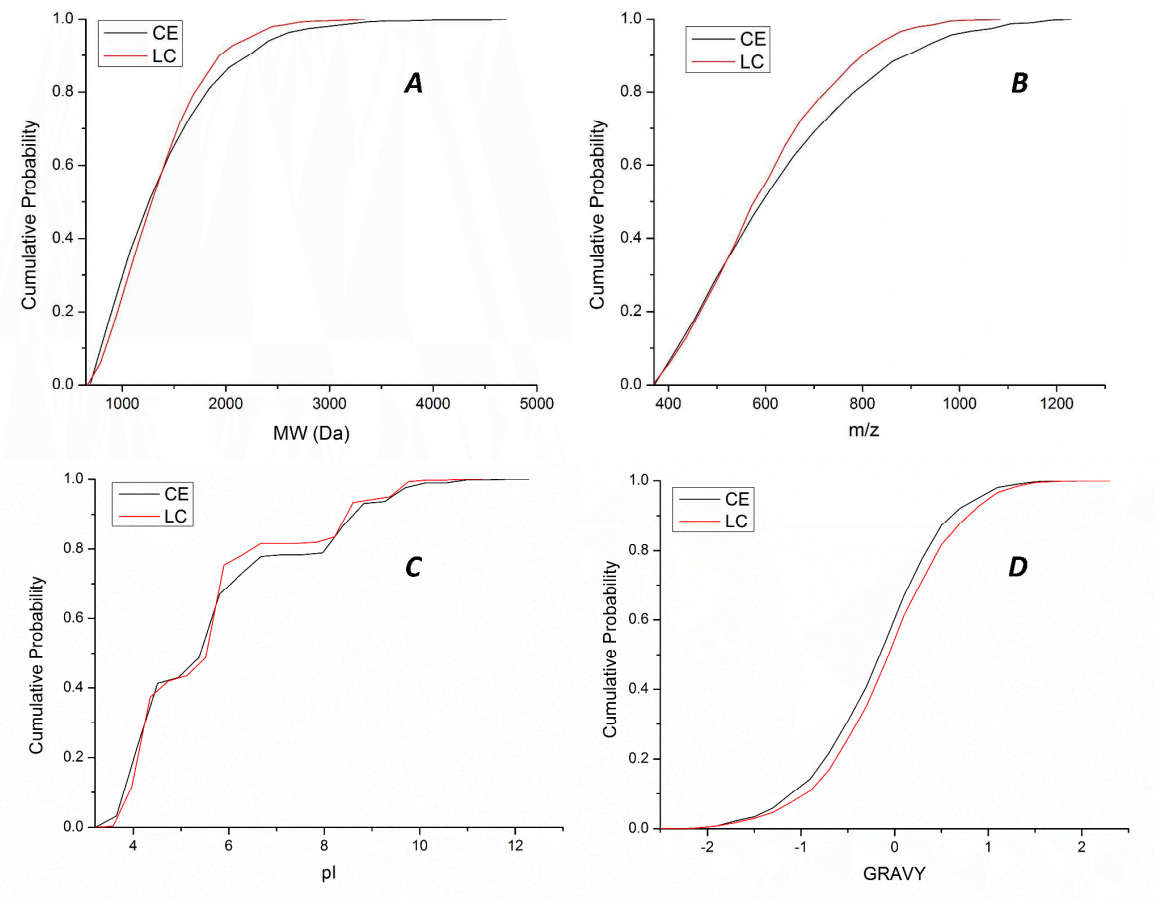

S- Figure 2 Cumulative distribution of molecular weight(A), m/z(B),pI values(C) and GRAVY values(D) of identified peptides in CZE-ESI-MS/MS (black) and UPLC-ESI-MS/MS (red) for 10 ng sample loading amount.
